# Supplementary material for: Immune-Metabolic Programs Drive Disease Trajectories in Paediatric Long COVID
Source: Research Square preprint supplement (doi:10.21203/rs.3.rs-7083240/v1), 2025-07-23
Supplement: Supplementary file 1 [file bf2a434140635460e247937c.docx]

**a b**

**
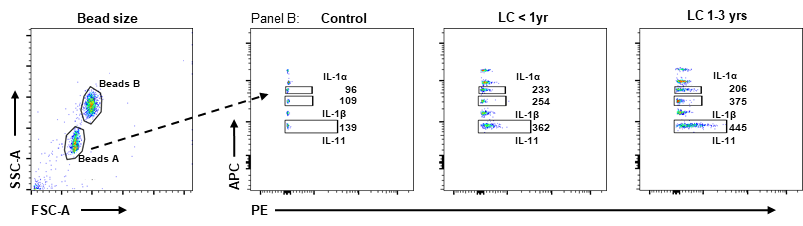
**
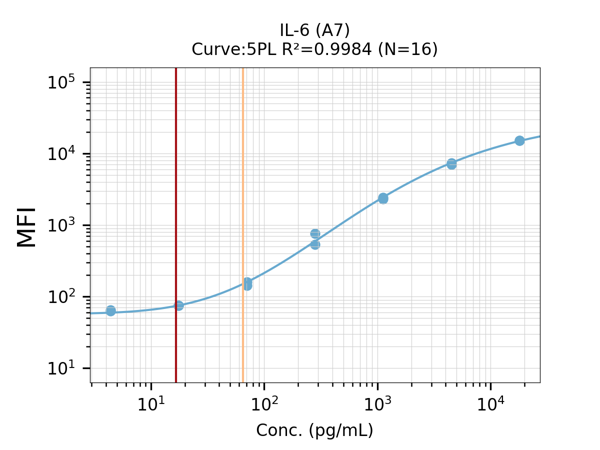


**c**


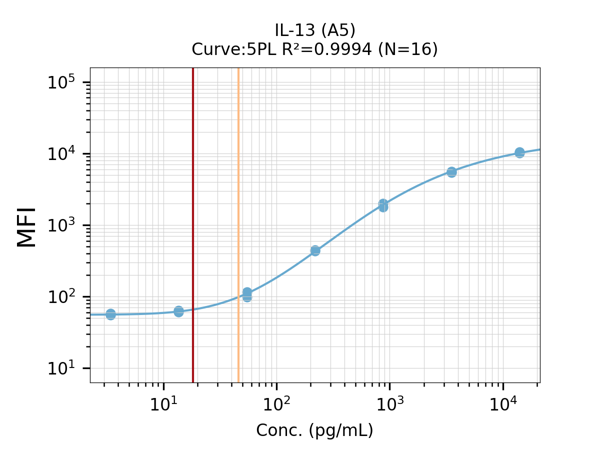

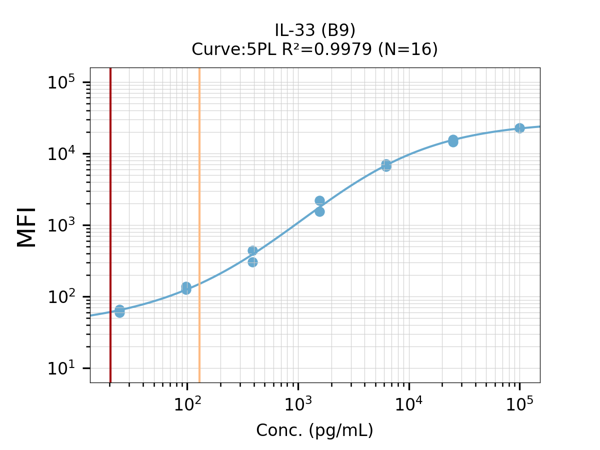

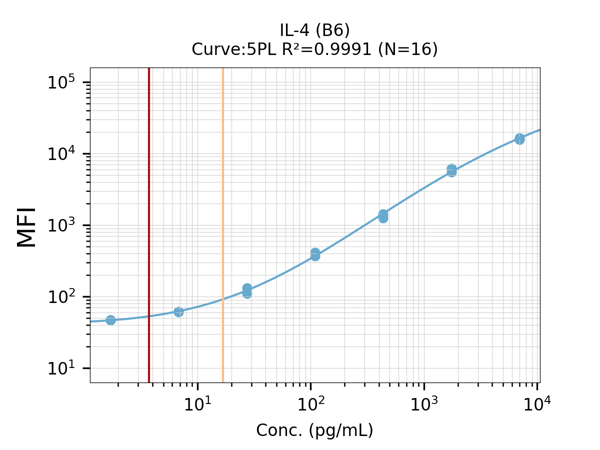

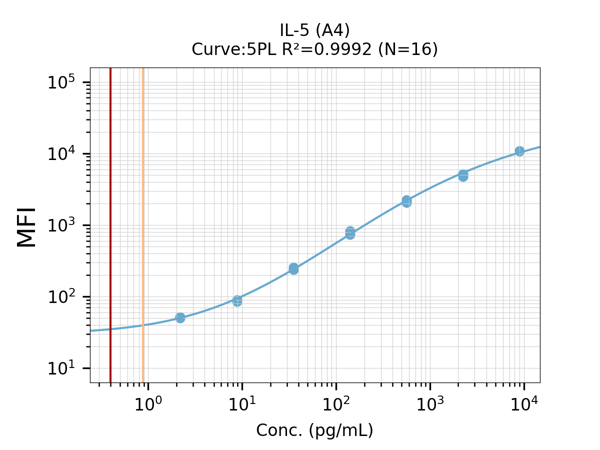


**d**


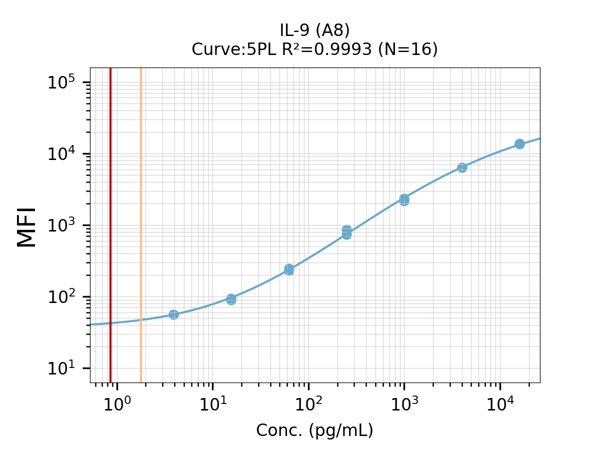

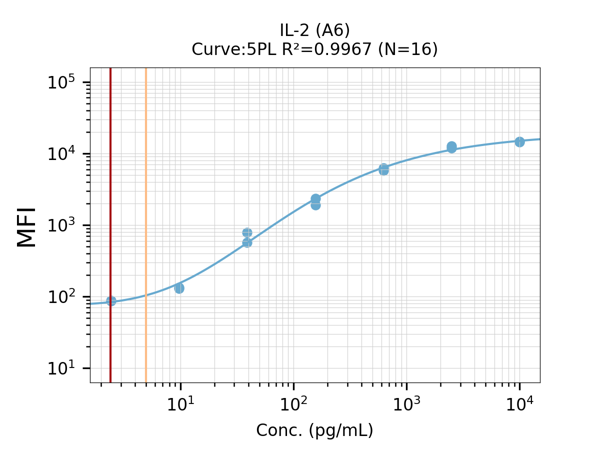

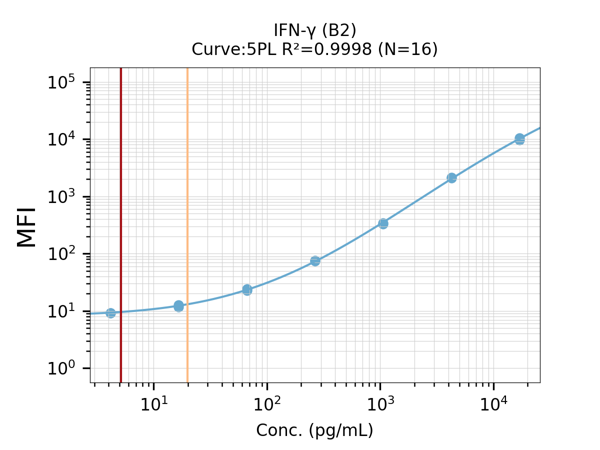

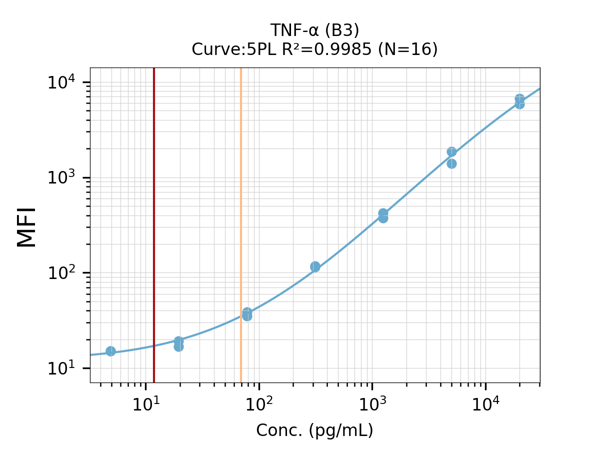


**e**


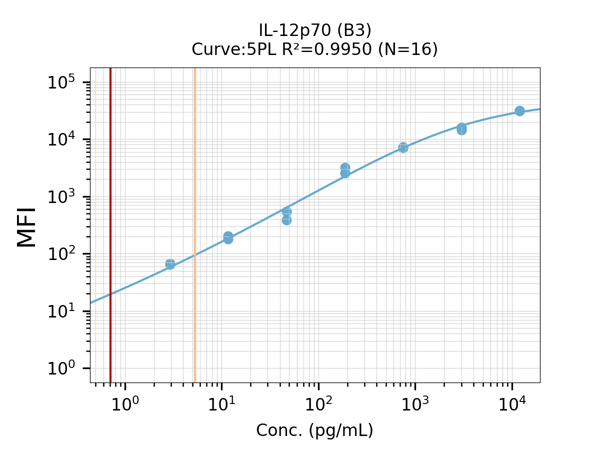

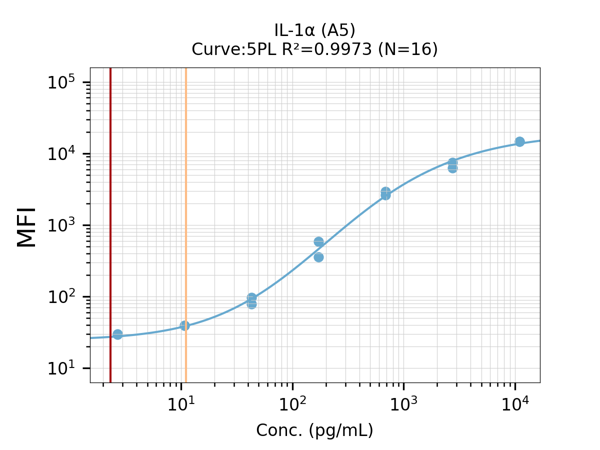

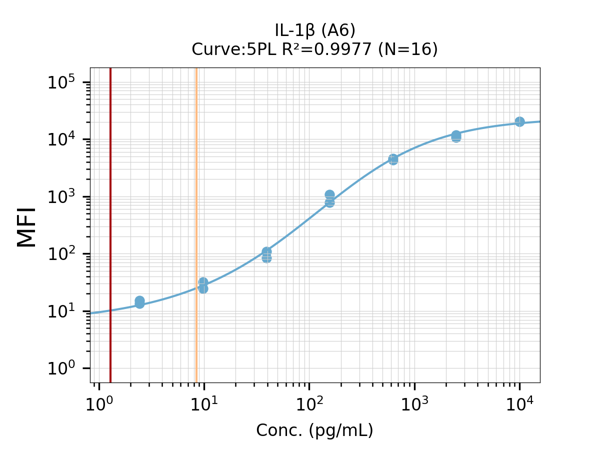

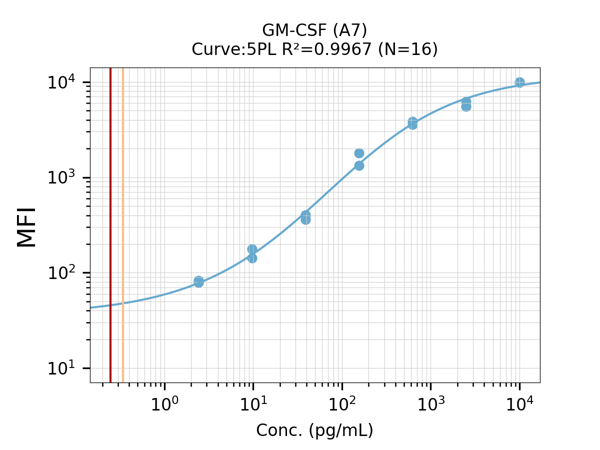


**f g**


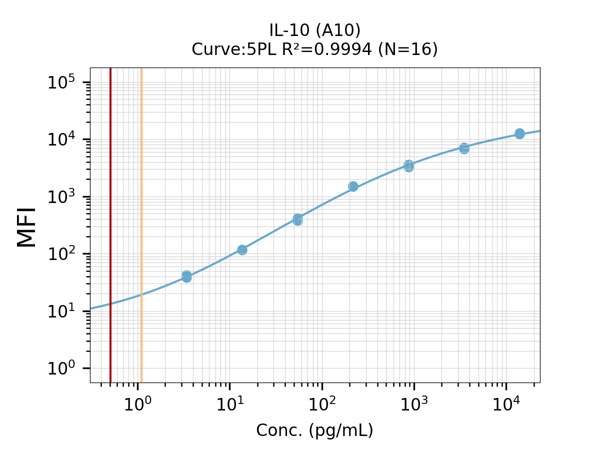

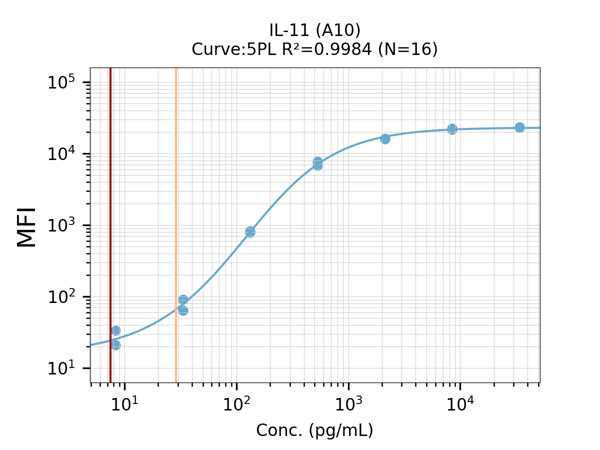

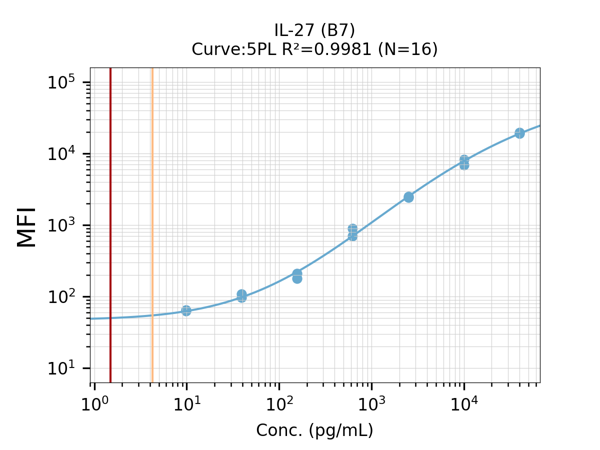

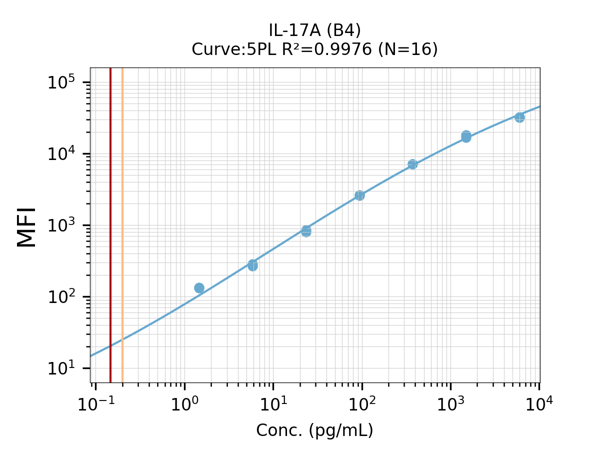


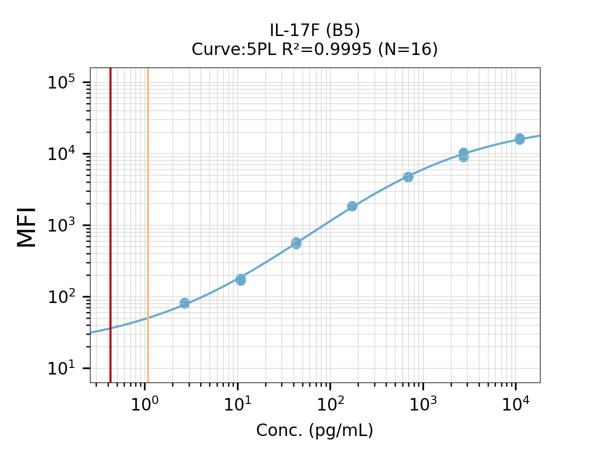

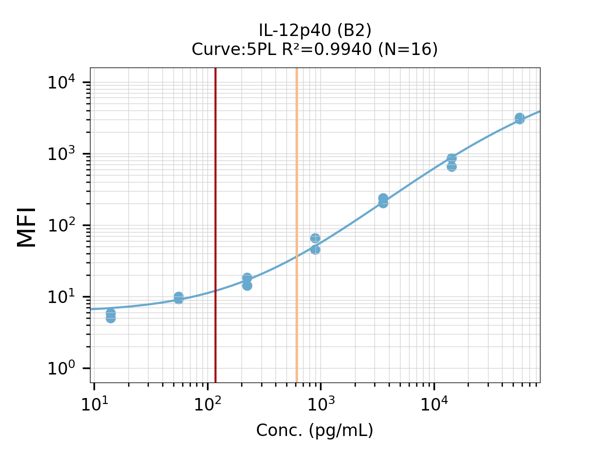

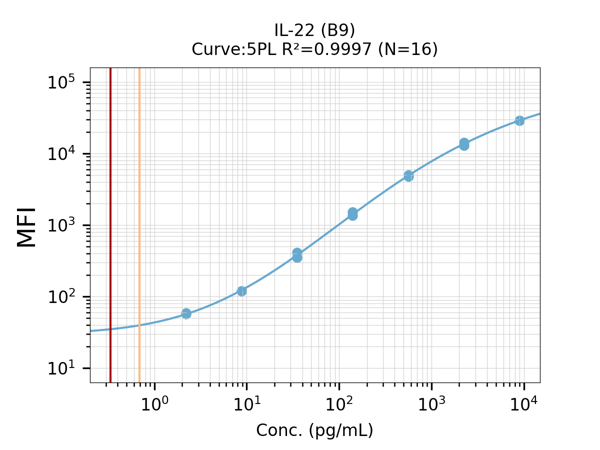

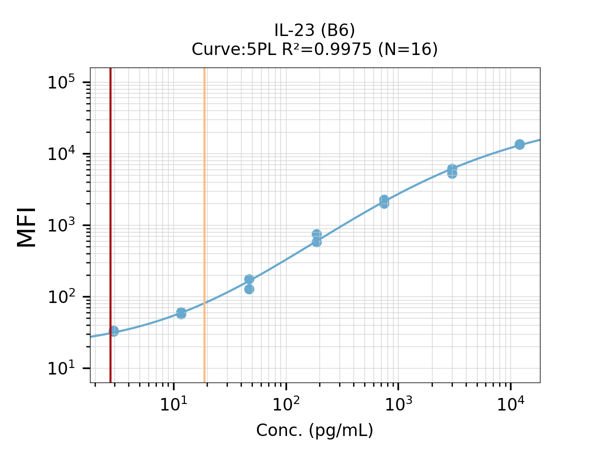


**Supplementary Fig 1.** Standard settings for cytokine quantification. (a) Representative dot plots of multiplex bead-based assay serum analysis from control group, LC patients within the first and second year of disease. Analysis is shown for the Human Cytokine Panel 2 cytokines IL-1α, IL-1β, and IL-11 among others. Each population represents the acquisition of a specific cytokine, the numbers represent the mean fluorescence intensity (MFI). (b-g) Standard curve concentration range measured for cytokines in the LEGENDplex Human Th Cytokine Panel or LEGENDplex Human Cytokine Panel 2 for (b) SARS-COV-2 related cytokines, (c) Th2/9 related cytokines, (d) Th1 related cytokines, (e) innate like cytokines, (f) regulatory cytokines and (g) Th17/22 related cytokines.
